# Supplementary material for: Potentially Functional Polymorphisms inPOU5F1Gene Are Associated with the Risk of Lung Cancer in Han Chinese
Source: Hindawi journal article supplement (doi:10.1155/2015/851320), 2015-01-01
Supplement: f1 [file 851320.f1.pdf]

## **SUPPLEMENTARY MATERIALS**

### **Potentially functional polymorphisms in *POU5F1* gene are associated with the risk of lung cancer in Han Chinese**

Rui Niu, Yuzhuo Wang, Meng Zhu, Yifan Wen, Jie Sun, Wei Shen, Yang Cheng, Jiahui Zhang, Guangfu Jin, Hongxia Ma, Zhibin Hu, Hongbing Shen, Juncheng Dai

**Supplementary Table 1. Functional annotation of 17 functional SNPs in *POU5F1* gene according to SNPinfo**

| SNP        | TFBS <sup>a</sup> | Splicing<br>(site) | Splicing<br>(ESE or ESS) <sup>b</sup> | Splicing<br>(abolish domain) | miRNA<br>(miRanda) | miRNA<br>(Sanger) | nsSNP <sup>c</sup> | Stop Codon |
|------------|-------------------|--------------------|---------------------------------------|------------------------------|--------------------|-------------------|--------------------|------------|
| rs1052989  | Y                 | --                 | --                                    | --                           | --                 | --                | --                 | --         |
| rs1108746  | Y                 | --                 | --                                    | --                           | --                 | --                | --                 | --         |
| rs12215963 | Y                 | --                 | --                                    | --                           | --                 | --                | --                 | --         |
| rs1265156  | Y                 | --                 | Y                                     | --                           | --                 | --                | --                 | --         |
| rs2269713  | Y                 | --                 | --                                    | --                           | --                 | --                | --                 | --         |
| rs2394882  | --                | --                 | Y                                     | --                           | --                 | --                | --                 | --         |
| rs3094188  | Y                 | --                 | --                                    | --                           | --                 | --                | --                 | --         |
| rs3130503  | --                | --                 | Y                                     | --                           | --                 | --                | --                 | --         |
| rs4713438  | Y                 | --                 | --                                    | --                           | --                 | --                | --                 | --         |
| rs879882   | Y                 | --                 | --                                    | --                           | --                 | --                | --                 | --         |
| rs885948   | Y                 | --                 | --                                    | --                           | --                 | --                | --                 | --         |
| rs887464   | Y                 | --                 | Y                                     | --                           | --                 | --                | --                 | --         |
| rs887466   | --                | --                 | Y                                     | --                           | --                 | --                | --                 | --         |
| rs887468   | Y                 | --                 | Y                                     | --                           | --                 | --                | --                 | --         |
| rs885950   | Y                 | --                 | --                                    | --                           | --                 | --                | --                 | --         |
| rs3130457  | Y                 | --                 | --                                    | --                           | --                 | --                | --                 | --         |
| rs9468877  | Y                 | --                 | Y                                     | --                           | --                 | --                | --                 | --         |

<sup>a</sup> Transcription factor binding sites;<sup>b</sup> ESE: Exonic splicing enhancer; ESS: Exonic splicing silencer;<sup>c</sup> Non-synonymous coding SNPs.
